# Supplementary material for: Game and Simulation Stimulate Conceptual Change about Molecular Emergence in Different Ways, with Potential Cultural Implications
Source: MDPI journal article supplement (doi:10.3390/educsci14040366), 2024-03-31
Supplement: s1 [file s1]

Archive with 1 entries (1 files):
- education-2922807-supplementary.pdf
